# Supplementary material
Source: Springer Nature journal article supplement (https://www.springermedizin.de/resource/supplementary/12985_2010_1100_MOESM2_ESM.pdf/9609140)

(a)

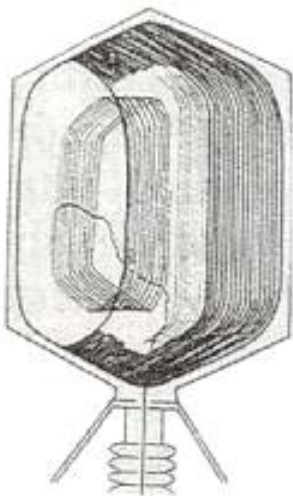

(b)

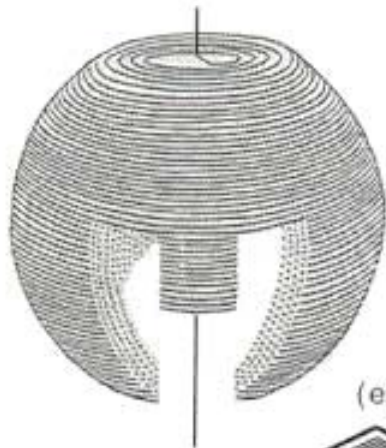

(c)

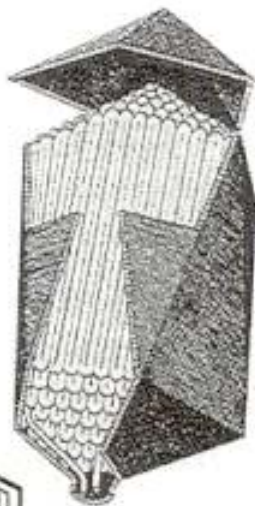

(d)

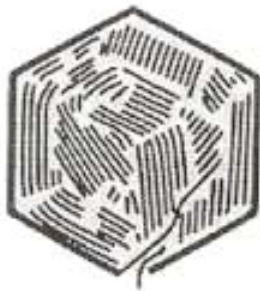

(e)

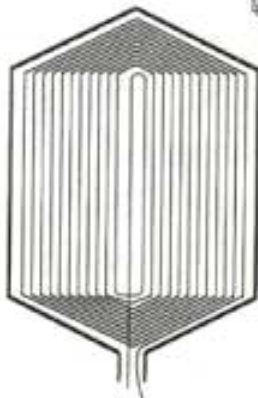

Supplement: MOESM2 [file 9609140]
